# Supplementary material for: Al(iii)-responsive “off–on” chemosensor based on rhodamine derivative and its application in cell imaging
Source: Royal Society of Chemistry journal article supplement (doi:10.1039/c8ra05359f), 2018-01-01
Supplement: c8ra05359f1.pdf [file c8ra05359f1.pdf]

## Supporting Information

Al(III)-Responsive “Off-On” Chemosensor Based on Rhodamine Derivative and Its Application in Cell Imaging

Chunwei Yu,<sup>a</sup> Li Jian,<sup>a\*</sup> Yuxiang Ji<sup>a</sup> and Jun Zhang<sup>a,b\*</sup>

<sup>a</sup> Department of Environmental Sciences, School of Tropical and Laboratory Medicine, Hainan Medical University, Haikou 571199, P. R. China.

<sup>b</sup> School of International Education, Hainan Medical University, Haikou 571199, P. R. China.

\*Corresponding authors' E-mails: jianli0622@163.com; jun\_zh1979@163.com.

### Contents

|                                                                                                                                                                                                                                                                                                                                                                                 |    |
|---------------------------------------------------------------------------------------------------------------------------------------------------------------------------------------------------------------------------------------------------------------------------------------------------------------------------------------------------------------------------------|----|
| <b>Fig. S1</b> a) Fluorescence emission spectra of <b>P</b> (10 $\mu\text{M}$ ) to different metal ions (10 $\mu\text{M}$ ) in ethanol-water solution (9:1, v:v, pH5.8, 20 mM HEPES); b) Fluorescence emission spectra of <b>P</b> (10 $\mu\text{M}$ ) to different anion ions and ROS or RNS (10 $\mu\text{M}$ ) in ethanol-water solution (9:1, v:v, pH5.8, 20 mM HEPES)..... | 2  |
| <b>Fig. S2</b> Fluorescence response of <b>P</b> (10 $\mu\text{M}$ ) to $\text{Al}^{3+}$ ions (10 $\mu\text{M}$ ) or to a mixture of the specified anion ions and ROS or RNS (50 $\mu\text{M}$ ) with $\text{Al}^{3+}$ ions (10 $\mu\text{M}$ ) in ethanol-water solution (9:1, v:v, pH5.8, 20 mM HEPES) .....                                                                  | 3  |
| <b>Fig. S3</b> Benesi-Hildebrand plot of <b>P</b> , assuming 1:1 stoichiometry for association between <b>P</b> and $\text{Al}^{3+}$ .....                                                                                                                                                                                                                                      | 3  |
| <b>Fig. S4</b> ESI-MS of <b>P</b> - $\text{Al}^{3+}$ complex .....                                                                                                                                                                                                                                                                                                              | 4  |
| <b>Fig. S5</b> Contrast of FT-IR spectrum between <b>P</b> and <b>P</b> - $\text{Al}^{3+}$ complex.....                                                                                                                                                                                                                                                                         | 4  |
| <b>Fig. S6</b> Contrast of NMR spectrum between <b>P</b> and <b>P</b> - $\text{Al}^{3+}$ complex.....                                                                                                                                                                                                                                                                           | 5  |
| <b>Fig. S7</b> Reversible experiment .....                                                                                                                                                                                                                                                                                                                                      | 6  |
| <b>Fig. S8</b> Confocal imaging for subcellular locations of <b>P</b> in HepG2 cells .....                                                                                                                                                                                                                                                                                      | 6  |
| <b>Fig. S9</b> ESI-MS of <b>P</b> .....                                                                                                                                                                                                                                                                                                                                         | 7  |
| <b>Fig. S10</b> $^1\text{H}$ NMR spectrum of <b>P</b> .....                                                                                                                                                                                                                                                                                                                     | 7  |
| <b>Fig. S11</b> $^{13}\text{C}$ NMR spectrum of <b>P</b> .....                                                                                                                                                                                                                                                                                                                  | 8  |
| <b>Table 1</b> Performances comparison of turn on fluorescent chemosensors for $\text{Al}^{3+}$ ion .....                                                                                                                                                                                                                                                                       | 9  |
| <b>Cal. 1</b> Quantum yield of chemosensor <b>P</b> .....                                                                                                                                                                                                                                                                                                                       | 10 |
| <b>Cal. 2</b> Binding constant of $\text{Al}^{3+}$ and chemosensor <b>P</b> .....                                                                                                                                                                                                                                                                                               | 10 |

**Fig. S1**

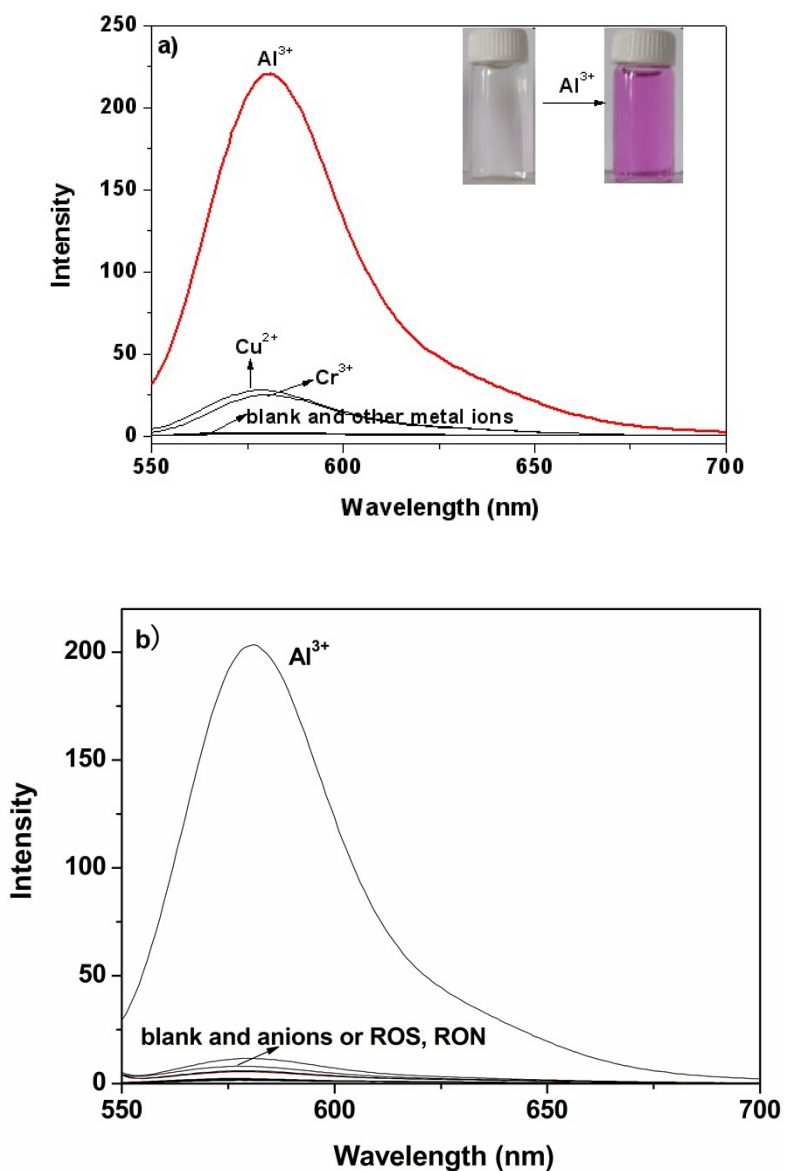

**Fig. S1** a) Fluorescence emission spectra of **P** (10 μM) to different metal ions (10 μM) in ethanol-water solution (9:1, v:v, pH5.8, 20 mM HEPES); b) Fluorescence emission spectra of **P** (10 μM) to different anion ions and ROS or RNS (10 μM) in ethanol-water solution (9:1, v:v, pH5.8, 20 mM HEPES).

**Fig. S2**

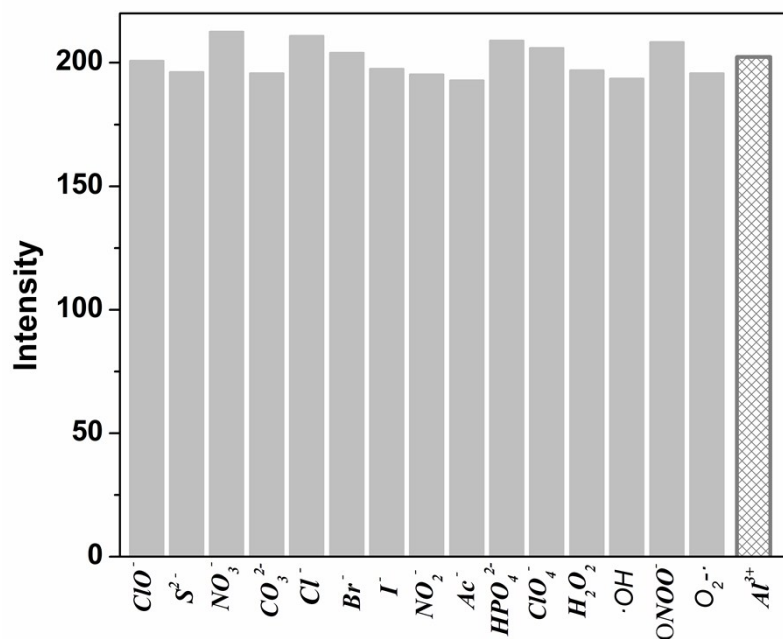

**Fig. S2** Fluorescence response of **P** (10 μM) to Al<sup>3+</sup> ions (10μM) or to a mixture of the specified anion ions and ROS or RNS (50 μM) with Al<sup>3+</sup> ions (10 μM) in ethanol-water solution (9:1, v:v, pH5.8, 20 mM HEPES).

**Fig. S3**

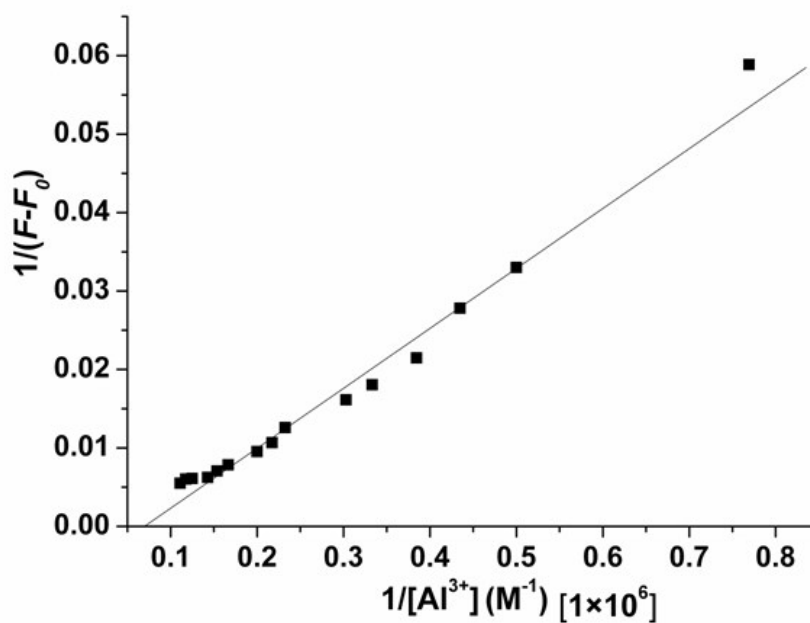

**Fig. S3** Benesi-Hildebrand plot of **P**, assuming 1:1 stoichiometry for association between **P** and Al<sup>3+</sup>.

Fig. S4

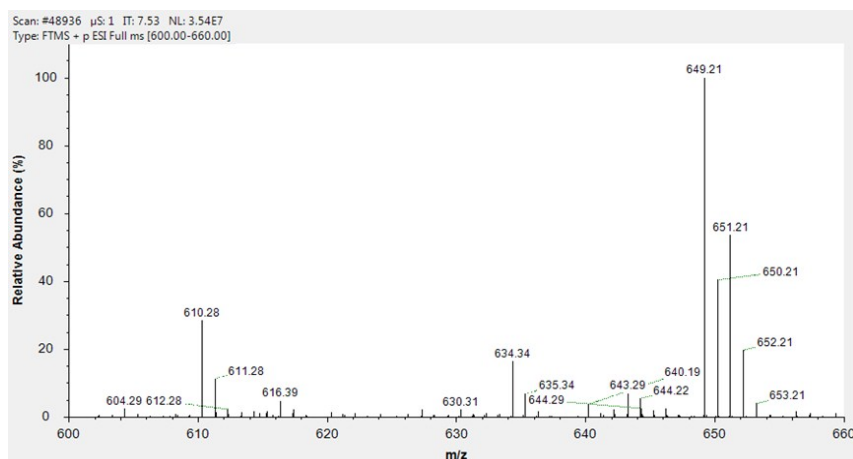

Fig. S4 ESI-MS of P-Al<sup>3+</sup> complex.

Fig. S5

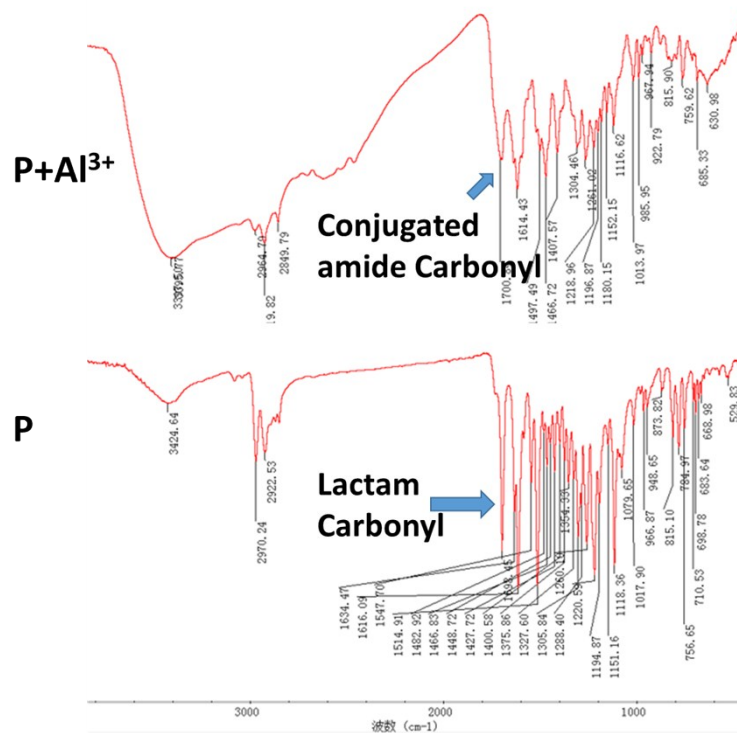

Fig. S5 Contrast of FT-IR spectrum between P and P-Al<sup>3+</sup> complex

Fig. S6

a)

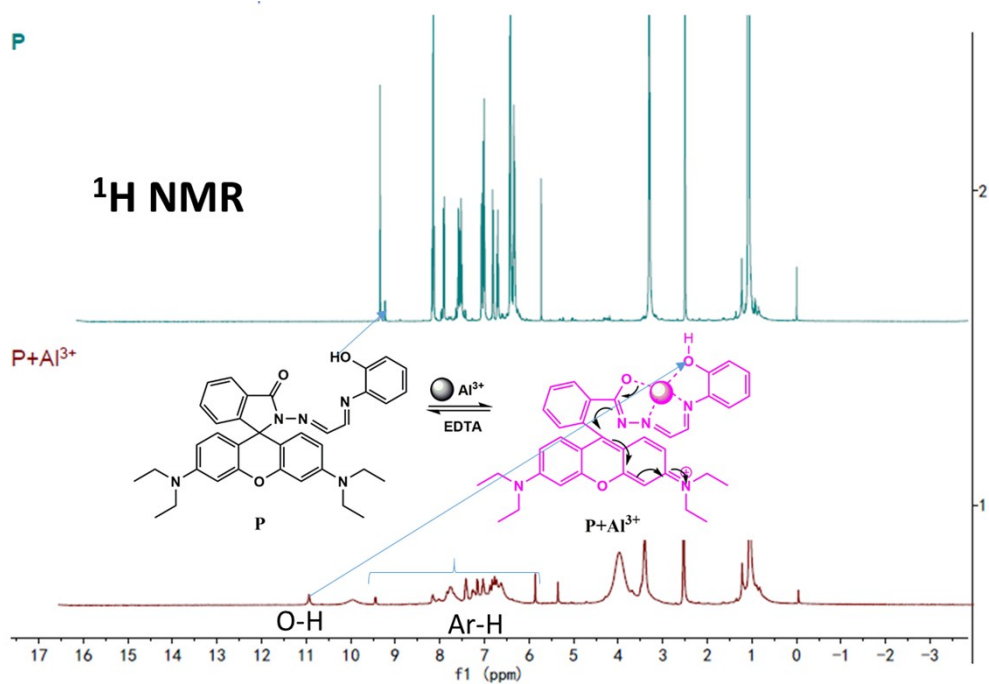

b)

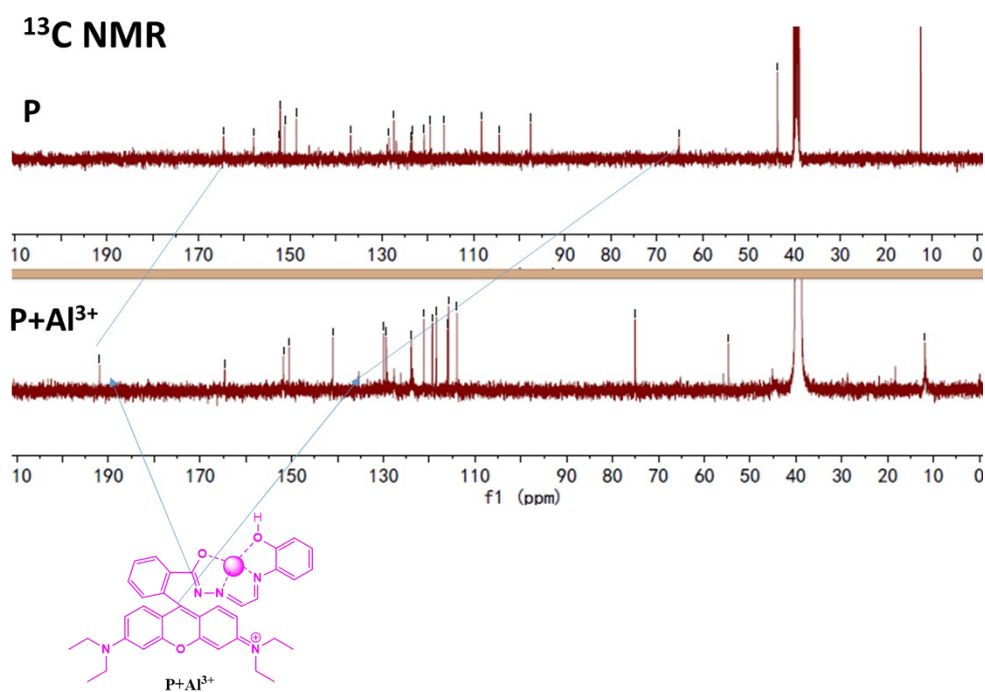

Fig. S6 a) Contrast of  $^1\text{H}$  NMR spectrum between **P** and **P-Al<sup>3+</sup>** complex; b) Contrast of  $^{13}\text{C}$  NMR spectrum between **P** and **P-Al<sup>3+</sup>** complex

**Fig. S7**

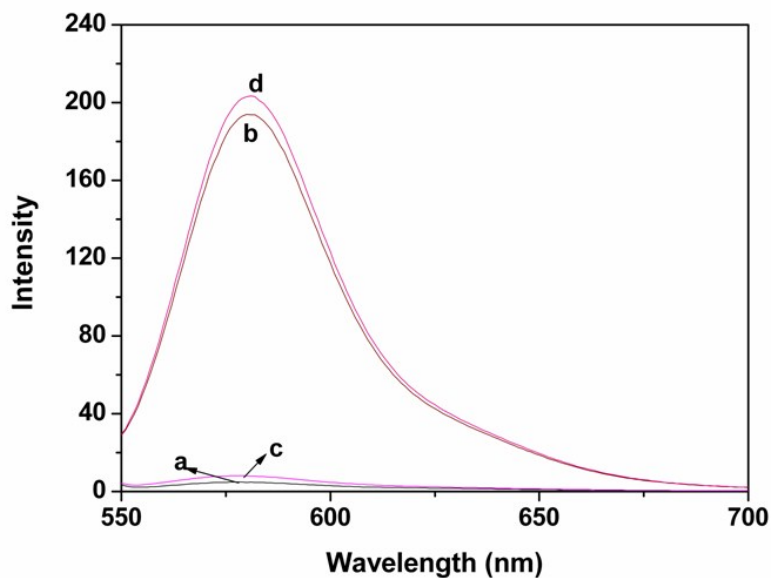

**Fig. S7** Reversible titration response of **P** to Al<sup>3+</sup> in ethanol-water solution (9:1, v:v, pH5.8, 20 mM HEPES): (a) **P** (10 μM); (b) **P** (10 μM) with Al<sup>3+</sup> (10 μM); (c) **P** (10 μM) with Al<sup>3+</sup> (10 μM) and then addition of EDTA (20 μM); (d) **P** (10 μM) with Al<sup>3+</sup> (10 μM) and EDTA (20 μM) and then addition of Al<sup>3+</sup> (30 μM).

**Fig. S8**

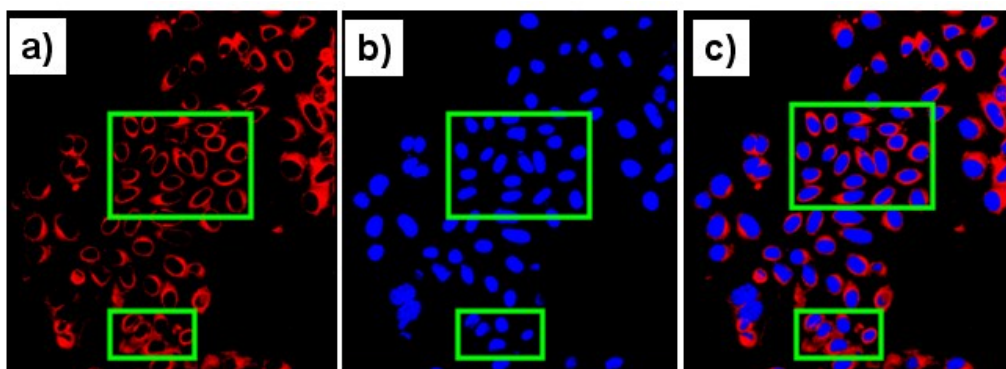

**Fig. S8** Confocal fluorescence images of HepG2 cells incubated with **P** (10 μM) and Hoechst 33342 (1 μg/mL) for 30 min. Cells loaded with Al<sup>3+</sup> (10 μM), then treated with **P** (10 μM) and Hoechst 33342 (1 μg/mL) for 30 min. (a) Red channel with **P**; (b) Blue channel with Hoechst 33342; (c) Overlay of images showing fluorescence from Hoechst 33342 (b) and **P** (a).

Fig. S9

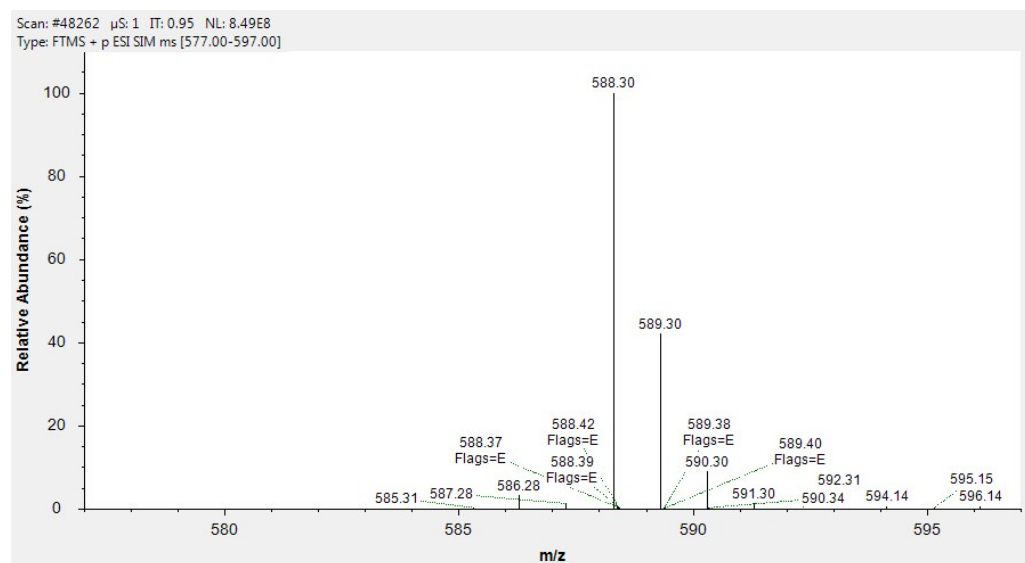

Fig. S9 ESI-MS of P

Fig. S10

17 in DMSO (proton)

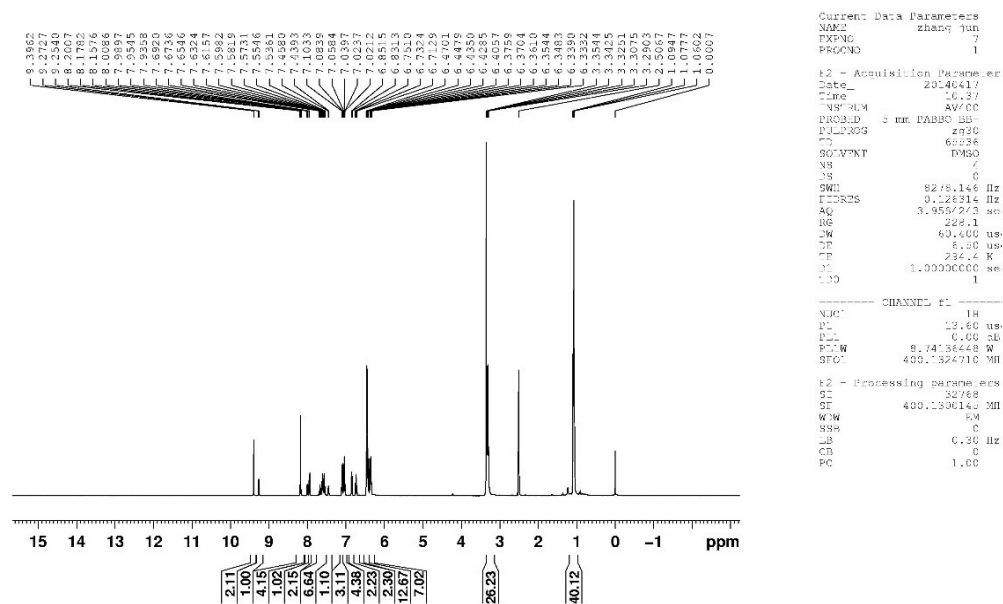

Fig. S10  $^1\text{H}$  NMR spectrum of P

Fig. S11

17

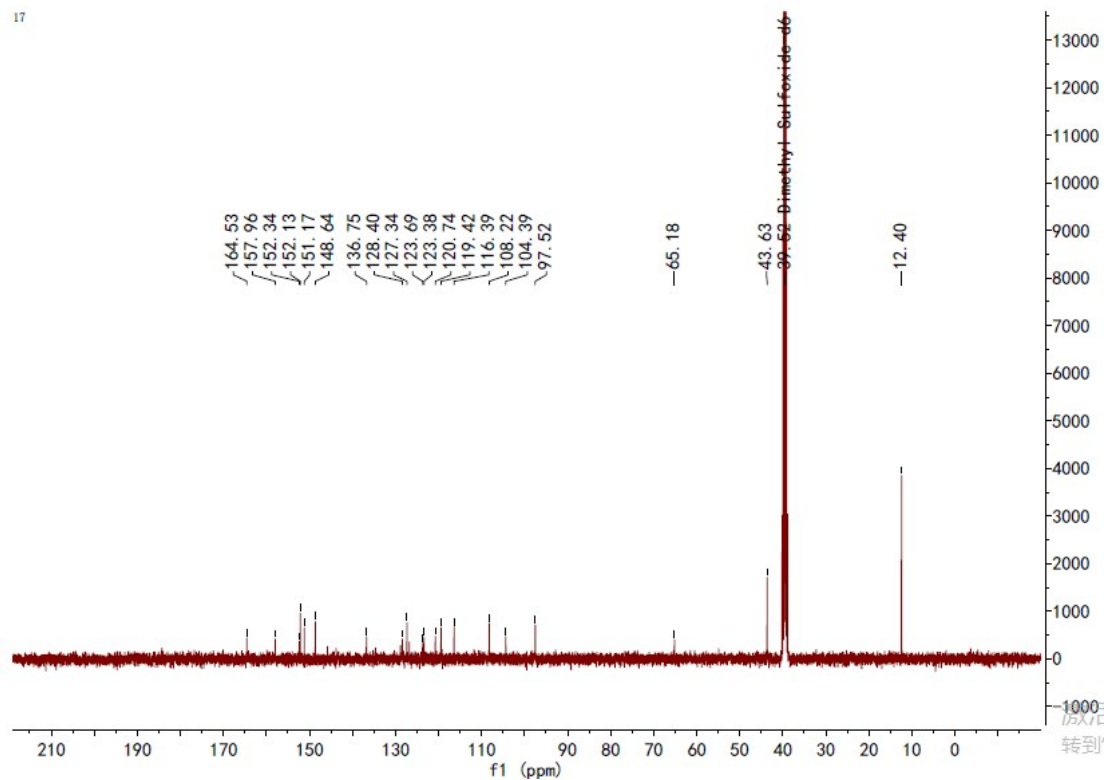

Fig. S11 <sup>13</sup>C NMR spectrum of P



**Table 1** Performances comparison of turn on fluorescent chemosensors for Al<sup>3+</sup> ion.

| Fluorescence parameter              | Fluorescence reagents         | Reproducibility | LOD ( $\mu\text{M}$ ) | Fluorescence quantum yield | Fluorescence lifetime | Detection media                                                     | Cell applications                                  | Binding constant ( $\text{M}^{-1}$ ) | Ref.      |
|-------------------------------------|-------------------------------|-----------------|-----------------------|----------------------------|-----------------------|---------------------------------------------------------------------|----------------------------------------------------|--------------------------------------|-----------|
| $\lambda_{\text{ex/em}}=418/518$ nm | Pyrazoline derivative         | Reversible      | NA                    | 0.574                      | NA                    | H <sub>2</sub> O-CH <sub>3</sub> CN (1:1, v/v, pH 7.2, 20 mM HEPES) | 3T3-L1, qualitative analysis                       | $2.13 \times 10^3$                   | [17]      |
| $\lambda_{\text{ex/em}}=445/525$ nm | Naphthaldehyde derivative     | Reversible      | 0.001                 | NA                         | NA                    | Ethanol                                                             | NA                                                 | $2.5 \times 10^3$                    | [18]      |
| $\lambda_{\text{ex/em}}=350/532$ nm | Pyrrolidine derivative        | Reversible      | NA                    | NA                         | NA                    | CH <sub>3</sub> CN                                                  | NA                                                 | $0.87 \times 10^4$                   | [19]      |
| $\lambda_{\text{ex/em}}=520/587$ nm | Rhodamine derivative          | Reversible      | 0.57                  | 0.303                      | NA                    | H <sub>2</sub> O-CH <sub>3</sub> CN (3:7, v/v, pH 7.4, HEPES)       | SiHa cells, qualitative analysis                   | $1.4 \times 10^4$                    | [20]      |
| $\lambda_{\text{ex/em}}=350/526$ nm | Naphthalimide derivative      | Reversible      | 0.34                  | 0.48                       | NA                    | H <sub>2</sub> O-ethanol (1:1, v/v, pH 7.2, Tris-HCl)               | NA                                                 | $2.6 \times 10^4$                    | [21]      |
| $\lambda_{\text{ex/em}}=500/582$ nm | Rhodamine derivative          | Reversible      | 0.11                  | 0.51                       | NA                    | H <sub>2</sub> O-ethanol (1:4, v/v, pH 7.2, 20 mM HEPES)            | NA                                                 | $7.03 \times 10^3$                   | [22]      |
| $\lambda_{\text{ex/em}}=345/490$ nm | Benzophenone azine derivative | Irreversible    | 0.27                  | NA                         | NA                    | Methanol                                                            | NA                                                 | NA                                   | [23]      |
| $\lambda_{\text{ex/em}}=560/584$ nm | Rhodamine derivative          | Reversible      | 0.059                 | NA                         | NA                    | H <sub>2</sub> O-CH <sub>3</sub> CN (3:7, v/v, pH 7.4, 1 mM HEPES)  | SiHa cells, qualitative analysis                   | $6.42 \times 10^4$                   | [24]      |
| $\lambda_{\text{ex/em}}=510/580$ nm | Rhodamine derivative          | Reversible      | 0.16                  | 0.45                       | NA                    | Ethanol-H <sub>2</sub> O (9:1, v/v, pH 5.8, 20 mM HEPES)            | HepG2 cells, qualitative and quantitative analysis | $6.9 \times 10^4$                    | This work |

### Cal. 1: Quantum yield of chemosensor **P**

The quantum yield ( $\Phi$ ) of the  $\text{Al}^{3+}$  rhodamine complex denotes the fluorescence quantum yield. It is obtained by comparison of the integrated area of the corrected emission spectrum of the sample with that of a solution of rhodamine in ethanol, which has a quantum yield of 0.89. The quantum yield ( $\Phi$ ) can be calculated from multiple measurements ( $n = 3$ ) with the following equation, where absorbance can be obtained from the absorption spectra and  $\int F$  can be calculated by summation of fluorescence intensity. Consequently, the quantum yield of the  $\text{Al}^{3+}$ -rhodamine complex can be calculated as 0.45.

$$\phi_{sample} = \frac{Abs_{standard} \phi_{standard} \int F_{sample}}{Abs_{sample} \int F_{standard}}$$

### Cal. 2 Binding constant of $\text{Al}^{3+}$ and chemosensor **P**

The binding constant was determined according to Benesi-Hildebrand method as follows: When assuming a 1:1 stoichiometry for interaction between chemosensor **P** and  $\text{Al}^{3+}$ , the equilibrium is given by following equation:

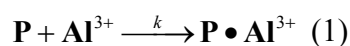

The association constant,  $k$ , is therefore expressed as:

$$k = \frac{[\mathbf{P} \bullet \text{Al}^{3+}]}{[\mathbf{P}][\text{Al}^{3+}]} = \frac{[\mathbf{P} \bullet \text{Al}^{3+}]}{([\mathbf{P}]_0 - [\mathbf{P} \bullet \text{Al}^{3+}])([\text{Al}^{3+}]_0 - [\mathbf{P} \bullet \text{Al}^{3+}])} \quad (2)$$

$[\mathbf{P} \bullet \text{Al}^{3+}]$ ,  $[\mathbf{P}]$ , and  $[\text{Al}^{3+}]$  represent the equilibrium concentrations of the complex, free **P**, and free  $\text{Al}^{3+}$ , respectively.  $[\mathbf{P}]_0$  and  $[\text{Al}^{3+}]_0$  are the initial concentrations of **P** and  $\text{Al}^{3+}$ , respectively. If  $[\text{Al}^{3+}]_0 \gg [\mathbf{P} \bullet \text{Al}^{3+}]$ , the Eq. 2 can be simplified as follows:

$$k = \frac{[\mathbf{P} \bullet \text{Al}^{3+}]}{([\mathbf{P}]_0 - [\mathbf{P} \bullet \text{Al}^{3+}])[\text{Al}^{3+}]_0} \quad (3)$$

Eq. 3 is transformed to:

$$\frac{1}{[\mathbf{P} \bullet \text{Al}^{3+}]} = \frac{1}{k[\mathbf{P}]_0[\text{Al}^{3+}]_0} + \frac{1}{[\mathbf{P}]_0} \quad (4)$$

Fluorescence intensity is given as follows:

$$F_0 = k_0[\mathbf{P}]_0 \quad (5)$$

$$F = k_0[\mathbf{P}]_0 + k_\infty[\mathbf{P} \bullet \text{Al}^{3+}] \quad (6)$$

$$F_{\max} = k_0[\mathbf{P}]_{\max} + k_\infty[\mathbf{P} \bullet \text{Al}^{3+}]_{\max} \quad (7)$$

where,  $F_0$  is the absorbance of  $\mathbf{P}$  without  $\text{Al}^{3+}$ ,  $F$  is the fluorescence intensity of  $\mathbf{P}$  obtained with  $\text{Al}^{3+}$ ,  $F_{\max}$  is the fluorescence intensity of  $\mathbf{P}$  in the presence of excess amount of  $\text{Al}^{3+}$ . By means of Eqs. 5, 6 and 7, the following equation is obtained:

$$\frac{F_{\max} - F_0}{F - F_0} = \frac{[\mathbf{P} \bullet \text{Al}^{3+}]_{\max}}{[\mathbf{P} \bullet \text{Al}^{3+}]} \quad (8)$$

In the presence of excess amount of  $\text{Al}^{3+}$ ,  $[\mathbf{P} \bullet \text{Al}^{3+}]_{\max}$  is almost equal to  $[\mathbf{P}]_0$ . The Eq. 8 can therefore be replaced as follows:

$$\frac{F_{\max} - F_0}{F - F_0} = \frac{[\mathbf{P}]_0}{[\mathbf{P} \bullet \text{Al}^{3+}]} \quad (9)$$

Using Eq. 4 and 9, the Benesi-Hildebrand equation is obtained as:

$$\frac{1}{F - F_0} = \frac{1}{K(F_{\max} - F_0)[\text{Al}^{3+}]_0} + \frac{1}{F_{\max} - F_0} \quad (10)$$

$F_0$  is the fluorescence intensity of  $\mathbf{P}$  without  $\text{Al}^{3+}$ ,  $F$  is the fluorescence intensity of  $\mathbf{P}$  obtained with  $\text{Al}^{3+}$ ,  $F_{\max}$  is the fluorescence intensity of  $\mathbf{P}$  in the presence of excess amount of  $\text{Al}^{3+}$ ,  $K$  is the binding constant ( $\text{M}^{-1}$ ) and was determined from the slope of the linear plot. Therefore, the binding constant is obtained of  $6.9 \times 10^4 \text{ M}^{-1}$ .
